# Supplementary material for: Evaluation and error apportionment of an ensemble of atmospheric chemistry transport modeling systems: multivariable temporal and spatial breakdown
Source: Copernicus journal article supplement (doi:10.5194/acp-17-3001-2017), 2017-02-28
Supplement: Supplementary file 1 [file acp-17-3001-2017-supplement.zip]

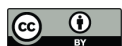

## *Supplement of*

# **Evaluation and error apportionment of an ensemble of atmospheric chemistry transport modeling systems: multivariable temporal and spatial breakdown**

**Efisio Solazzo et al.**

*Correspondence to:* Efisio Solazzo ([efisio.solazzo@ec.europa.eu](mailto:efisio.solazzo@ec.europa.eu))

- [acp-17-3001-2017-supplement-title-page.pdf](#)
- [supplementary\\_REV2](#)
  - [Supplementary\\_Tables\\_FINAL\\_REV1.docx](#)
  - [Supplementary\\_figures\\_FINAL\\_REV2.docx](#)

The copyright of individual parts of the supplement might differ from the CC-BY 3.0 licence.
